# Supplementary material for: Healthcare Workers and Nonhealthcare Workers Pro-Vaccination Attitude and Its Associated Factors towards COVID-19 Vaccine Globally: A Systematic Review and Meta-Analysis
Source: Interdiscip Perspect Infect Dis. 2022 Oct 10;2022:2443785. doi: 10.1155/2022/2443785 (PMC9576430; doi:10.1155/2022/2443785)
Supplement: Supplementary Materials — Supplementary 1 file: Methodological quality assessment of cross-sectional studies using modified Newcastle-Ottawa Scale (NOS). Supplementary 2 file: PRISMA 2020 Checklist. [file 2443785.f1.zip]

Archive with 2 entries (2 files):
- Supplementary 1 file.docx
- Supplementary 2 file.docx
